# Supplementary material for: Phonon transport in the ground state of two-dimensional silicon and germanium
Source: Royal Society of Chemistry journal article supplement (doi:10.1039/c6ra14351b), 2016-01-01
Supplement: c6ra14351b1.pdf [file c6ra14351b1.pdf]

Supplementary Information for

# Phonon Transport in Ground State of Two-dimensional Silicon and Germanium

Yang Han<sup>1</sup>, Jinming Dong<sup>2</sup>, Guangzhao Qin<sup>1</sup>, and Ming Hu<sup>1,3,\*</sup>

<sup>1</sup>*Institute of Mineral Engineering, Division of Materials Science and Engineering, Faculty of Georesources  
and Materials Engineering, RWTH Aachen University, 52064 Aachen, Germany*

<sup>2</sup>*Group of Computational Condensed Matter Physics, National Laboratory of Solid State Microstructures  
and Department of Physics, Nanjing University, Nanjing 210093, People's Republic of China*

<sup>3</sup>*Aachen Institute for Advanced Study in Computational Engineering Science (AICES), RWTH Aachen  
University, 52062 Aachen, Germany*

This file includes:

Supplementary discussion (SI: 1-2);

SI-1. Density of K grid  $N_K \times N_K$  for solving BTE

SI-2. Cutoff radius for third-order calculations

Supplementary Figures S1-S2

---

\* Author to whom correspondence should be addressed. E-Mail: [hum@ghi.rwth-aachen.de](mailto:hum@ghi.rwth-aachen.de) (M.H.)

## SI-1. Density of K grid $N_K \times N_K$ for solving BTE

The convergence of  $\kappa$  with respect to the BZ sampling density of K grid  $N_K \times N_K$  for solving BTE is tested. The  $\kappa$  values obtained for the LHD silicene/germanene are shown in **Fig. S1**, from which we can see that  $\kappa$  values of the both structures are stable as long as the density of K grid  $N_K \times N_K$  is larger than  $19 \times 19$ . The largest tested density of K grid is  $N_K \times N_K = 83 \times 83$ , where  $\kappa$  values obtained for LHD silicene/germanene are 5.9 and 1.6 W/mK, respectively. All analysis in our work is based on this largest density ( $N_K \times N_K = 83 \times 83$ ).

## SI-2. Cutoff radius for third-order calculations

Our method involves discarding all interactions between atomic triplets at distances larger than a cutoff radius  $N_{\text{cutoff}}$ . Naturally, a satisfactory result demands that this radius exceeds the range of physically relevant anharmonic interactions in the crystal. To select a value of  $N_{\text{cutoff}}$  we analyzed the convergence of our computed  $\kappa$  at  $T = 300$  K. We started by considering interactions up to  $N_{\text{cutoff}} = 3^{\text{rd}}$  nearest neighbors and we progressively included more coordination shells. The results are shown in **Fig. S2**. We found that  $N_{\text{cutoff}} = 4^{\text{th}}$  for the LHD silicene/germanene yield satisfactorily converged values.

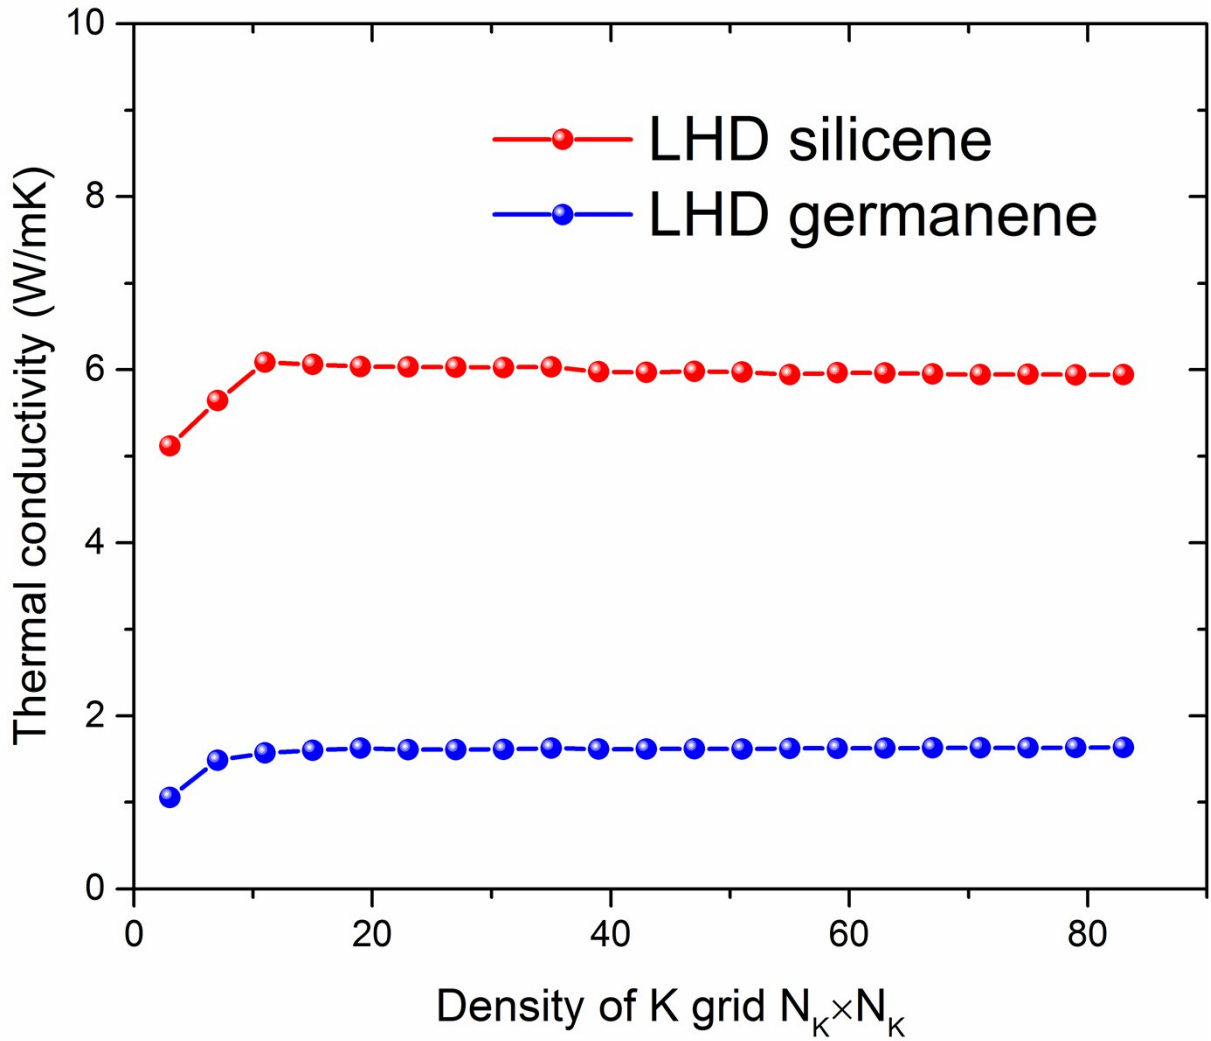

**Figure S1.** Convergence test of  $\kappa$  for the LHD silicene/germanene at  $T = 300$  K with respect to the density of K grid  $N_K \times N_K$  employed in solving BTE (all  $\kappa$  are obtained at the selected  $N_{\text{cutoff}} = 4$  which is employed in the 3<sup>rd</sup> IFC calculations).

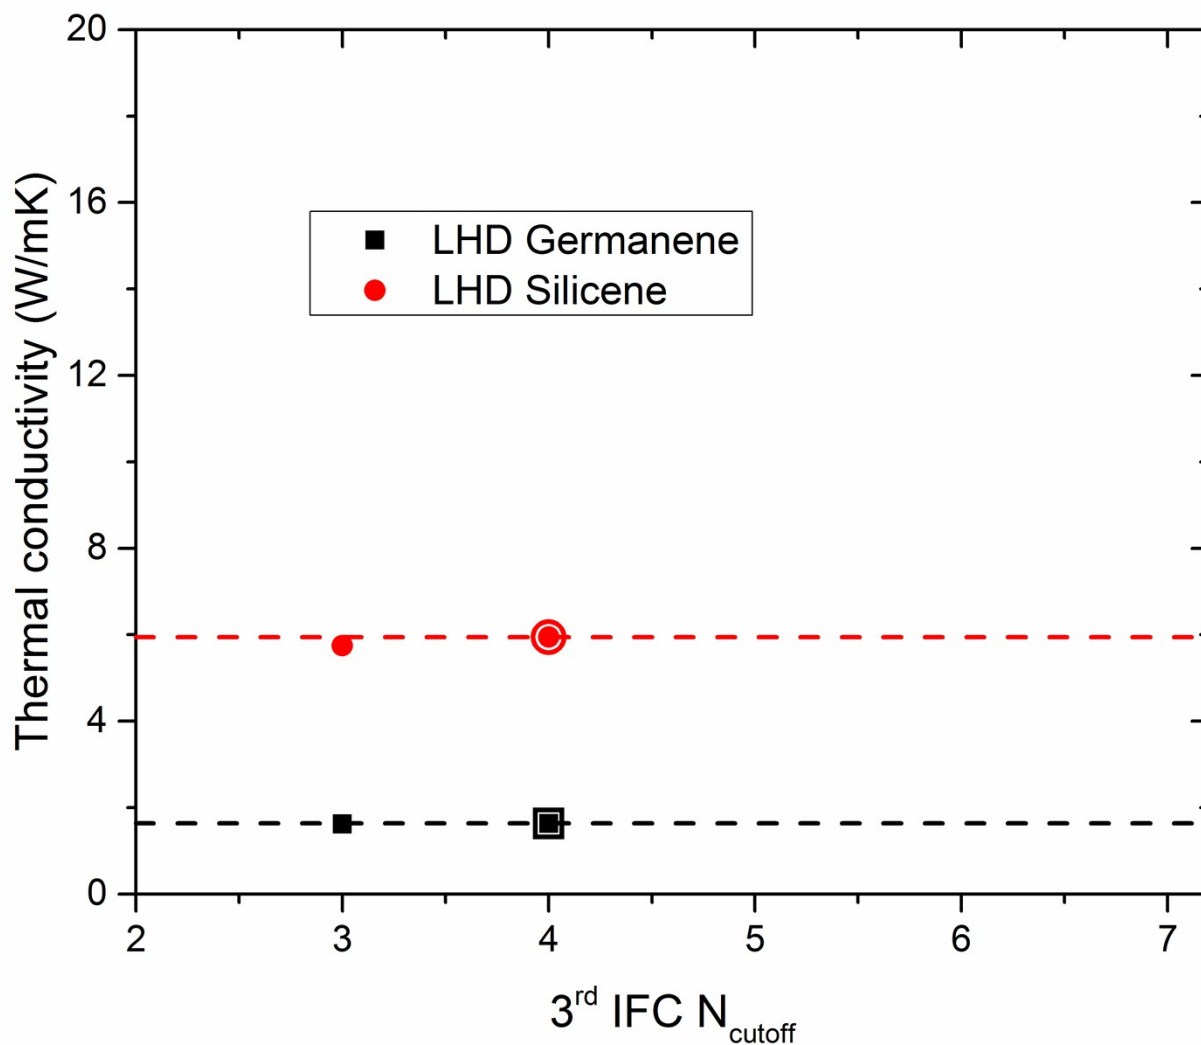

**Figure S2.** Convergence test of  $\kappa$  for the LHD silicene/germanene at  $T = 300$  K with respect to the  $N_{\text{cutoff}}$  employed in the 3<sup>rd</sup> IFC calculations (all  $\kappa$  are obtained at the density of K grid  $N_K=83$ ). The selected  $N_{\text{cutoff}}$  values of the 4<sup>th</sup> for LHD silicene/germanene are highlighted by black hollow square and red hollow circle, respectively.
